# Supplementary material for: Equation for General Description of Power Behaviour in Fuel Cells
Source: Hindawi journal article supplement (doi:10.1155/2018/2678050), 2018-11-07
Supplement: f1 [file 2678050.f1.docx]

Appendix A

From the polarization curves presented in different research articles, the experimental values were estimated. With this information it was possible to reconstruct the graphical representations and the values of Ir and Pr were calculated. For that reason, the values obtained by this way are going to be presented here.

| Verhage et. al | | Wang et. al | |
| --- | --- | --- | --- |
| Figure 5.a. | | **Figure 5.b.** | |
| I (A) | **P (kW)** | **I (A)** | **V (V)** |
| 50 | 3.0 | **0** | 0 |
| 100 | 5.3 | **0.031** | 0.894 |
| 150 | 7.5 | **0.112** | 0.841 |
| 200 | 9.0 | **0.243** | 0.789 |
| 250 | 10.2 | **0.425** | 0.741 |
| 300 | 10.9 | **0.643** | 0.692 |
|  |  | **0.868** | 0.641 |
|  |  | **1.062** | 0.592 |
|  |  | **1.212** | 0.543 |
|  |  | **1.325** | 0.492 |
|  |  | **1.431** | 0.443 |
|  |  | **1.487** | 0.394 |

| Figure 6. Tawfik et. Al | | | | | |
| --- | --- | --- | --- | --- | --- |
| a | | **b** | | **c** | |
| I (A) | **P (W)** | **I (A)** | **P (W)** | **I (A)** | **P (W)** |
| 0 | 0 | **0** | 0 | **0** | 0 |
| 0.0592 | 0.00005 | **0.0500** | 0.000046 | **0.0615** | 0.00005 |
| 0.1000 | 0.00008 | **0.1000** | 0.00008 | **0.1000** | 0.000077 |
| 0.1370 | 0.0001 | **0.2000** | 0.00014 | **0.2000** | 0.00015 |
| 0.2185 | 0.00015 | **0.3000** | 0.0002 | **0.3000** | 0.000211 |
| 0.3000 | 0.00019 | **0.4000** | 0.000254 | **0.4000** | 0.000261 |
| 0.3074 | 0.0002 | **0.5000** | 0.000296 | **0.5000** | 0.000307 |
| 0.4000 | 0.00024 | **0.6000** | 0.000315 | **0.6000** | 0.000337 |
| 0.4400 | 0.00025 | **0.7000** | 0.000329 | **0.7000** | 0.000355 |
| 0.5000 | 0.000285 | **0.8000** | 0.000333 | **0.8000** | 0.000361 |
| 0.6000 | 0.0003 | **0.9000** | 0.000315 | **0.9000** | 0.00035 |
| 0.7000 | 0.000317 | **1.0000** | 0.000233 | **1.0000** | 0.000318 |
| 0.8000 | 0.000317 | **1.1000** | 0.000148 | **1.1000** | 0.000268 |
| 0.9000 | 0.000305 | **1.1500** | 0.000056 | **1.1500** | 0.0002 |
| 1.0000 | 0.00028 |  |  |  |  |
| 1.1000 | 0.000235 |  |  |  |  |
| 1.2000 | 0.00017 |  |  |  |  |
| 1.3000 | 0.000067 |  |  |  |  |

| Figure 7. Yang et. al | | | | | |
| --- | --- | --- | --- | --- | --- |
| a | | **b** | | **c** | |
| i (mA/cm2) | **V (V)** | **i (mA/cm2)** | **V (V)** | **i (mA/cm2)** | **V (V)** |
| 0 | 0.9 | **0** | 0.95 | **0** | 0.96 |
| 5.4 | 0.85 | **14** | 0.85 | **40** | 0.85 |
| 14 | 0.8 | **40** | 0.8 | **100** | 0.8 |
| 50 | 0.75 | **100** | 0.75 | **175** | 0.75 |
| 100 | 0.7 | **170** | 0.7 | **290** | 0.7 |
| 170 | 0.65 | **250** | 0.65 | **411** | 0.66 |
| 230 | 0.6 | **290** | 0.6 | **510** | 0.6 |
